# Supplementary material for: Clinical efficacy of selenium supplementation in patients with Hashimoto thyroiditis: A systematic review and meta-analysis
Source: PubMed Central journal article supplement — Medicine (Baltimore). 2023 May 17;102(20):e33791. doi: 10.1097/MD.0000000000033791 (PMC10194801; doi:10.1097/md.0000000000033791), 2023-05-17
Supplement: medi-102-e33791-s001.pdf [file medi-102-e33791-s001.pdf]

Supplemental table 1. Search table summarizing records from PubMed, Web of Science, EMBASE, Scopus, and Cochrane Library.

| Keywords                                     | PubMed      | Web of science | EMBASE      | Scopus      | Cochrane Library | Total        |
|----------------------------------------------|-------------|----------------|-------------|-------------|------------------|--------------|
| (Hashimoto) AND (selenium) AND (thyroiditis) | 121 records | 170 records    | 234 records | 180 records | 34 records       | 739 records  |
| (selenomethionine) AND (Hashimoto)           | 33 records  | 52 records     | 71 records  | 56 records  | 17 records       | 229 records  |
| (selenomethionine) AND (thyroiditis)         | 109 records | 85 records     | 90 records  | 71 records  | 39 records       | 394 records  |
| Total                                        | 263 records | 307 records    | 395 records | 307 records | 90 records       | 1362 records |
