# Supplementary material for: Clinical efficacy of selenium supplementation in patients with Hashimoto thyroiditis: A systematic review and meta-analysis
Source: PubMed Central journal article supplement — Medicine (Baltimore). 2023 May 17;102(20):e33791. doi: 10.1097/MD.0000000000033791 (PMC10194801; doi:10.1097/md.0000000000033791), 2023-05-17
Supplement: medi-102-e33791-s002.pdf [file medi-102-e33791-s002.pdf]

Supplemental table 2. Newcastle-Ottawa Scale for assessing the quality of studies in meta-analysis (4-5 scores:Low quality, 6-7 scores: Intermediate quality, 8-9 sores: High quality)

|                     | Selection                        |                                |                       |                        | Comparability of cohorts                                                   | Outcome                   |                                                     |                   | Score |
|---------------------|----------------------------------|--------------------------------|-----------------------|------------------------|----------------------------------------------------------------------------|---------------------------|-----------------------------------------------------|-------------------|-------|
| Case control study  | Is the case definition adequate? | Representativeness of the case | Selection of controls | Definition of controls | Comparability of cases and controls on the basis of the design or analysis | Ascertainment of exposure | Same method of ascertainment for cases and controls | Non-response rate | total |
| Krysiak A 2019 [10] | ★                                | ★                              |                       | ★                      | ★                                                                          | ★                         | ★                                                   | ★                 | 7     |
| Krysiak B 2018 [11] | ★                                | ★                              |                       | ★                      | ★                                                                          | ★                         | ★                                                   | ★                 | 7     |
| Nordio A 2017 [12]  | ★                                | ★                              |                       | ★                      | ★                                                                          | ★                         | ★                                                   | ★                 | 7     |
| Nordio B 2017 [13]  | ★                                | ★                              |                       | ★                      | ★                                                                          | ★                         | ★                                                   | ★                 | 7     |
| Krysiak C 2012 [14] | ★                                | ★                              |                       | ★                      | ★                                                                          | ★                         | ★                                                   |                   | 6     |
| Onal 2012 [15]      | ★                                | ★                              |                       | ★                      | ★                                                                          | ★                         | ★                                                   | ★                 | 7     |
| Karanikas 2008 [16] | ★                                | ★                              |                       | ★                      | ★                                                                          | ★                         | ★                                                   |                   | 6     |
